# Supplementary material
Source: publisher site journal article supplement (https://natureconservation.pensoft.net/article/29841/download/suppl/35/)
Supplement: Supplementary file 1

| Taxa | Salinity | Temperature |
| --- | --- | --- |
| *Acanthostomella conicoides* | -0.093 | 0.081 |
| *Amphorides* cfr. *amphora* | -0.012 | 0.066 |
| *Amphorides laackmannii* | -0.011 | 0.052 |
| *Amphorides quadrilineata* | -0.030 | 0.022 |
| *Amphorides quadrilineata* var*. minor* | 0.041 | 0.004 |
| *Amphorellopsis acuta* | 0.074 | 0.202 |
| *Amphorellopsis* sp. | 0.029 | 0.024 |
| *Codonella* sp*.* | 0.007 | -0.033 |
| *Codonellopsis schabi* | 0.026 | 0.000 |
| *Codonellopsis* sp. | 0.004 | -0.042 |
| *Dadayiella ganymedes* | -0.040 | 0.014 |
| *Dadayiella* sp. | -0.025 | 0.036 |
| *Dictyocysta elegans* | -0.101 | 0.035 |
| *Dictyocysta lepida* | 0.001 | 0.018 |
| *Eutintinnus apertus* | -0.098 | 0.360 |
| *Eutintinnus fraknoi* | 0.012 | 0.313 |
| *Eutintinnus lusus-undae* | -0.097 | 0.254 |
| *Eutintinnus* sp. | -0.059 | 0.070 |
| *Eutintinnus stramentus* | -0.058 | 0.085 |
| *Eutintinnus tubulosus* | -0.076 | 0.172 |
| *Favella* sp. | 0.000 | 0.045 |
| *Helicostomella subulata* | -0.189 | 0.186 |
| *Leprotintinnus nordqvisti* | 0.039 | 0.038 |
| *Metacylis* sp. | -0.011 | 0.206 |
| *Metacylis joergenseni* | 0.055 | 0.254 |
| *Protorhabdonella curta* | -0.012 | 0.020 |
| *Rhabdonella spiralis* | 0.000 | 0.030 |
| *Salpingella decurtata* | -0.016 | 0.094 |
| *Salpingella rotundata* | -0.121 | 0.341 |
| *Salpingella* sp. | -0.097 | 0.165 |
| *Steenstrupiella* sp. | 0.030 | 0.000 |
| *Steenstrupiella steenstrupii* | -0.039 | 0.053 |
| *Stenosemella nivalis* | 0.133 | -0.439 |
| *Stenosemella ventricosa* | -0.029 | -0.130 |
| *Tintinnopsis beroidea* | -0.106 | 0.149 |
| *Tintinnopsis campanula* | 0.055 | -0.061 |
| *Tintinnopsis compressa* | -0.067 | 0.113 |
| *Tintinnopsis cylindrica* | -0.156 | 0.116 |
| *Tintinnopsis nana* | -0.094 | 0.125 |
| *Tintinnopsis radix* | -0.054 | 0.141 |
| *Tintinnopsis parvula* | -0.039 | -0.042 |
| *Tintinnopsis* sp. | -0.164 | 0.062 |
